# Supplementary material for: Zinc-doped hydroxyapatite: an UVA light photocatalyst for the removal of bisphenol A
Source: Royal Society of Chemistry journal article supplement (doi:10.1039/d2nj01621d), 2022-01-01
Supplement: d2nj01621d1.pdf [file d2nj01621d1.pdf]

## Supplementary Material

### Zinc-doped hydroxyapatite: An UVA light photocatalyst for the removal of Bisphenol A

Benitez-Maldonado D.V., García-Díaz E., Sabinas-Hernández Sergio A., Silva-González, R., Robles-Águila M. J.

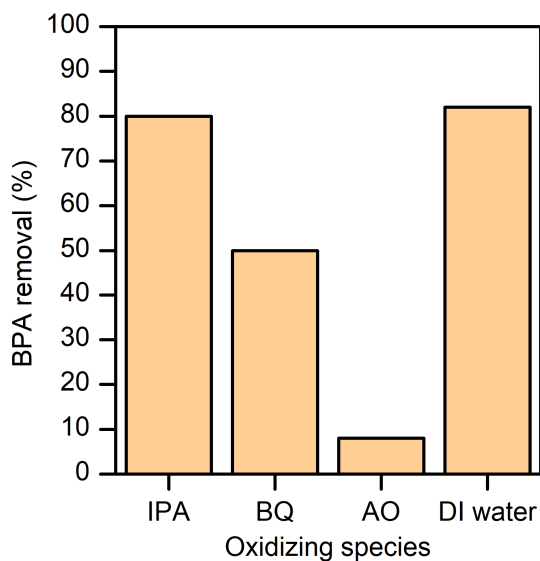

**Fig S1.** BPA photodegradation in the presence of different oxidizing species, 1 mM of isopropanol (IPA) for hydroxyl radicals, 1mM *p*-benzoquinone (BQ) for superoxide and 1 mM ammonium oxalate (AO) for electron holes.

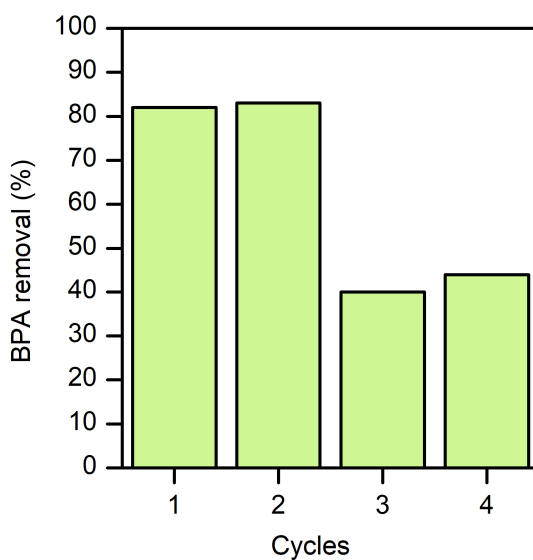

**Fig S2.** Removal of BPA by Zn-Hap with 4 h irradiation cycles
